# Supplementary material for: H-Abstraction reactions by OH, HO2, O, O2 and benzyl radical addition to O2 and their implications for kinetic modelling of toluene oxidation
Source: Royal Society of Chemistry journal article supplement (doi:10.1039/c7cp07779c), 2018-01-01
Supplement: c7cp07779c1.zip [file c7cp07779c1.zip]

## SUPPORTING INFORMATION: POLIMI Kinetic Mechanism Validation.

## H-abstraction Reactions by OH, HO2, O, O2 and Benzyl Radical Addition to O2 and Their Implications for Kinetic Modelling of Toluene Oxidation.

# M. Pelucchi1, C. Cavallotti1, T. Faravelli1, S.J. Klippenstein2

### *1 Department of Chemistry, Materials and Chemical Engineering “G. Natta”, Politecnico di Milano, Milan, Italy*

### *2 Chemical Sciences and Engineering Division, Argonne National Laboratory, Argonne, IL, USA*

This document reports an extensive comparison of the POLIMI kinetic model predictions with experimental measurements over a broad range of conditions, both for toluene pyrolysis and oxidation.

**Pyrolysis**

Figure S 1: Experimental (symbols) [1] and simulated (lines) concentration profiles of toluene, methane, acetylene and diacetylene in the shock tube pyrolysis of toluene at different temperatures and pressures between 0.2-0.5 atm.

Figure S 2: Experimental (symbols) [2] and simulated (lines) mole fraction profiles of toluene pyrolysis in a flow reactor at different pressures.

Figure S 3: Experimental (symbols) [2] and simulated (lines) mole fraction profiles of toluene pyrolysis in a flow reactor at different pressures.

Figure S 4: Experimental (symbols) [2] and simulated (lines) mole fraction profiles of toluene pyrolysis in a flow reactor at different pressures.

Figure S 5: . Experimental (symbols) [3] and simulated (lines) mole fraction profiles in the shock tube pyrolysis of toluene at total pressures of ~10 atm and residence time near 600 µs. Species profiles have been shifted to lower temperatures of 70 K, due to uncertainties in the reflected shock temperatures as discussed in the previous literature [2, 14, 15].

Figure S 6: Experimental (symbols) [4,5] and simulated (lines) mole fraction profiles in the shock tube pyrolysis of toluene at 45 bar. Species profiles have been shifted to lower temperatures of 30 K, due to uncertainties in the reflected shock temperatures as discussed in the previous literature [2, 14, 15].

**Oxidation**

Figure S 7: Experimental (symbols) [6] and simulated (lines) mole fraction profiles from JSR oxidation of toluene at atmospheric pressure. Blue circles and solid lines: 923 K, φ=0.9 (1.7% fuel), red diamonds and solid lines: 873 K, φ=0.9 (1.7% fuel), black square and dashed lines: 893 K, φ=0.9 (1.7% fuel), pink triangles and dashed lines: 893 K, φ=0.45 (1.4% fuel). Results are reported as a function of the calculated and experimental conversion.

Figure S 8: Experimental (symbols) [2] and simulated (lines) from the JSR oxidation of toluene 10 atm, φ=0.5.

Figure S 9: Experimental (symbols) [7] and simulated (lines) from the JSR oxidation of toluene 1 atm, φ=0.5.

Figure S 10: Experimental (symbols) [2] and simulated (lines) from the JSR oxidation of toluene 10 atm, φ=1.0.

Figure S 11: Experimental (symbols) [7] and simulated (lines) from the JSR oxidation of toluene 1 atm, φ=1.0.

Figure S 12: Experimental (symbols) [2] and simulated (lines) from the JSR oxidation of toluene 10 atm, φ=1.5.

Figure S 13: Experimental (symbols) [7] and simulated (lines) from the JSR oxidation of toluene 1 atm, φ=1.5.

Figure S 14: Experimental (symbols) [8] and simulated (lines) ignition delay times of toluene/O2/Ar mixtures in shock tube at different pressures and equivalence ratios.

Figure S 15: Experimental (symbols) [9] and simulated (lines) ignition delay times of toluene/O2/Ar mixtures in shock tube at different pressures and equivalence ratios.

Figure S 16: Experimental (symbols) [10] and simulated (lines) ignition delay times of toluene/O2/Ar mixtures in shock tube at different pressures and equivalence ratios.

Figure S 17: Experimental (symbols) [11] and simulated (lines) shock tube ignition delay times of toluene/air mixtures for p=12 and 50 atm, φ=0.25, 0.5, 1.0.

Figure S 18: Experimental (symbols) [12] and simulated (lines) shock tube ignition delay times of toluene/air mixtures for p=20 and 40 atm, φ=0.5, 1.0, 2.0.

Figure S 19: Comparison of shock tube data (symbols) of toluene/n-heptane/air mixtures at p=10, 30 and 50 atm, φ=0.3 and 1.0 [13] and constant volume model simulations (lines).

Figure S 20: Experimental (symbols) [13] and simulated mole fraction profiles in the shock tube oxidation of toluene at 22 bar with equivalence ratios of φ= 1.0. Simulations have been shifted to lower temperature of 60 K, based on uncertainties in reflected shock conditions as previously discussed in the literature [2, 14, 15].

Figure S 21: Experimental (symbols) [13] and simulated mole fraction profiles in the shock tube oxidation of toluene at 22 bar with equivalence ratios of φ= 5.0. Simulations have been shifted to lower temperature of 60 K, based on uncertainties in reflected shock conditions as previously discussed in the literature [2, 14, 15].

Figure S 22: Experimental (symbols) [13] and simulated mole fraction profiles in the shock tube oxidation of toluene at 50 bar with equivalence ratios of φ= 1.0. Simulations have been shifted to lower temperature of 60 K, based on uncertainties in reflected shock conditions as previously discussed in the literature [2, 14, 15].

Figure S 23: Experimental (symbols) [13] and simulated mole fraction profiles in the shock tube oxidation of toluene at 50 bar with equivalence ratios of φ= 5.0. Simulations have been shifted to lower temperature of 60 K, based on uncertainties in reflected shock conditions as previously discussed in the literature [2, 14, 15].

Figure S 24: Experimental (symbols) [13] and simulated mole fraction profiles in the shock tube oxidation of toluene at 550 bar with equivalence ratios of φ= 1.0. Simulations have been shifted to lower temperature of 60 K, based on uncertainties in reflected shock conditions as previously discussed in the literature [2, 14, 15].

Figure S 25: Experimental (symbols) [13] and simulated mole fraction profiles in the shock tube oxidation of toluene at 550 bar with equivalence ratios of φ= 1.0. Simulations have been shifted to lower temperature of 60 K, based on uncertainties in reflected shock conditions as previously discussed in the literature [2, 14, 15].

Figure S 26: Experimental (symbols) [16-18] and simulated (lines) laminar flame speeds of toluene/air as function of equivalence ratio, at different pressures (p=1-20 atm) and initial temperatures (T=298-423 K).

[1] K. M. Pamidimukkala, R. D. Kern, M. R. Patel, H. C. Wei, J. H. Kiefer, J. Phys. Chem. 91 (1987) 2148-2154.

[2] W. Yuan, Y. Li, P. Dagaut, J. Yang, F. Qi, Combust. Flame 162 (1) (2015) 22-40.

[3] M.B. Colket, D.J. Seery, Proc. Combust. Inst. 25 (1994) 883-891.

[4] R. Sivaramakrishnan, R.S. Tranter, K. Brezinsky, J. Phys. Chem. A 110 (2006) 9388–9399.

[5] R. Sivaramakrishnan, R.S. Tranter, K. Brezinsky, J. Phys. Chem. A 110 (2006) 9400–9404.

[6] R. Bounaceur, I. Da Costa, R. Fournet, F. Billaud, F. Battin-Leclerc, Int. J. Chem. Kinet. 37 (2005) 25–49.

[7] Dagaut, P., G. Pengloan, and A. Ristori. Phys Chem Chem Phys 4.10 (2002): 1846-1854.

[8] A. Burcat, C. Snyder, T. Brabbs, NASA Technical Memorandum 87312, Washington, D.C., May 1986.

[9] G. Pengloan, P. Dagaut, N. Djebaili-Chaumeix, C.E. Paillard, M. Cathonnet, Proceedings of the Colloque Combustion Propre, Orleans, France, June 6–8, 2001, pp. 9.

[10] V. Vasudevan, D.F. Davidson, R.K. Hanson, Proc. Combust. Inst. 30 (2005) 1155–1163.

[11] H.-P.S. Shen, J. Vanderover, M.A. Oehlschlaeger, Proc. Combust. Inst. 32 (2009) 165–172.

[12] Zhang, Y., Somers, K. P., Mehl, M., Pitz, W. J., Cracknell, R. F., Curran, H. J., Proc. Combust. Inst. 36 (2017) 413-421.

[13] R. Sivaramakrishnan, R.S. Tranter, K. Brezinsky, Combust. Flame 139 (2004) 340–350.

[14] K. Narayanaswamy, G. Blanquart, H. Pitsch, Combust. Flame 157 (2010) 1879–1898.

[15] W.K. Metcalfe, S. Dooley, F.L. Dryer, Energy Fuels 25 (2011) 4915–4936.

[16] L. Sileghem, V.A. Alekseev, J. Vancoillie, K.M. Van Geem, E.J.K. Nilsson, S. Verhelst, A.A. Konnov, Fuel 12 (2013) 355–365.

[17] Dirrenberger, P., Glaude, P. A., Bounaceur, R., Le Gall, H., da Cruz, A. P., Konnov, A. A., & Battin-Leclerc, F., Fuel, 115 (2014) 162-169.

[18] Wang, G., Li, Y., Yuan, W., Zhou, Z., Wang, Y., & Wang, Z., Combust. Flame, 184, (2017) 312-323.
